# Supplementary material
Source: PubMed Central journal article supplement (PMC3937647)
Supplement: supp_M113.527796_jbc.M113.527796-1.pdf [file supp_M113.527796_jbc.M113.527796-1.pdf]

## Supplementary Information

### Activation of Protein Kinase PKR Requires Dimerization-induced *cis*-phosphorylation within the Activation Loop

Madhusudan Dey, Brian Rick Mann, Ashish Anshu, M. Amin-ul Mannan

Department of Biological Sciences  
University of Wisconsin-Milwaukee  
Milwaukee, WI-53211

To whom correspondence should be addressed: Madhusudan Dey, Department of Biological Sciences, University of Wisconsin-Milwaukee, Milwaukee, WI-53211, Room 460, Lapham Hall, 3209 N Maryland Avenue, Phone: 414-229-4309, Fax: 414-229-3926, E-mail: [deym@umw.edu](mailto:deym@umw.edu)

**Figure S1: The PKR-KD bound to eIF2 $\alpha$  superimposes well on the PKR-KD<sup>K296R</sup>**

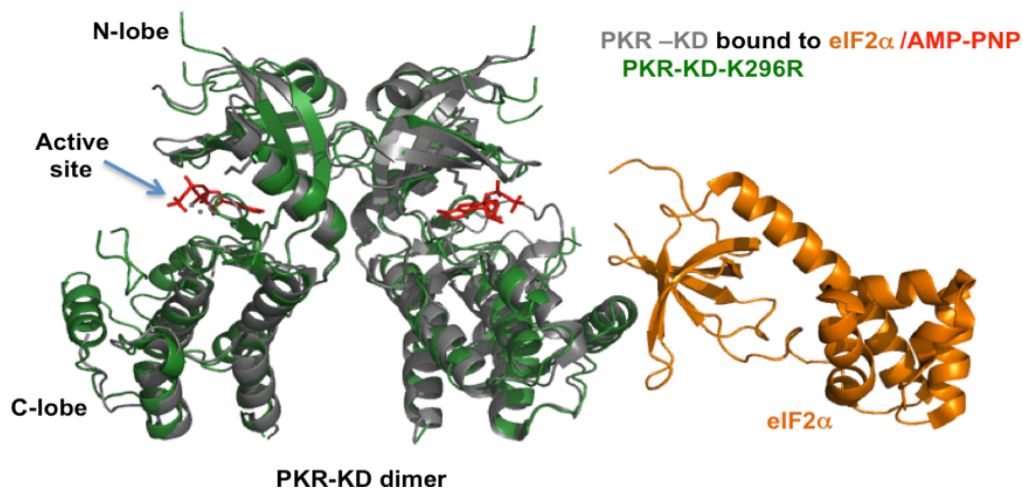

Fig S1: Structural coordinates of the PKR-KD-K296R (PDB ID: 3UIU) and the PKR-KD bound to eIF2 $\alpha$  and AMP-PNP (PDB ID: 2A19) [1] were aligned in a single PyMol file by pair wise alignment (root mean square deviation = 1.508). Proteins are shown as a ribbon-presentation (PKR-KD in grey; PKR-KD-K296R in green; eIF2 $\alpha$  in orange; and AMP-PNP in red). Each kinase domain composed of a smaller N-terminal lobe (N-lobe) and larger C-terminal lobe (C-lobe).

**Table 1: List of plasmids used in this study**

| Plasmid | Description           | Reference |
|---------|-----------------------|-----------|
| D109    | Flag-tagged-PKR-WT    | [2]       |
| D110    | Flag-tagged PKR-K296R | [2]       |
| D112    | Flag-tagged PKR-D266R | [2]       |

|       |                                        |                |
|-------|----------------------------------------|----------------|
| D771  | Flag-tagged PKR-Y323A                  | [2]            |
| D119  | Flag-tagged PKR-T446A                  | [2]            |
| D111  | Flag-tagged PKR-T446D                  | This study     |
| D113  | Flag-tagged PKR-R307A                  | This study     |
| D114  | Flag-tagged PKR-R307K                  | This study     |
| D116  | Flag-tagged PKR-K304A                  | This study     |
| D122  | Flag-tagged PKR <sup>phk1</sup>        | This study     |
| D123  | Flag-tagged PKR <sup>phk1</sup> -E182A | This study     |
| D607  | Flag-tagged PKR <sup>phk1</sup> -D266R | This study     |
| D771  | Flag-tagged PKR <sup>phk1</sup> -Y323A | This study     |
| D121  | Flag-tagged PKR <sup>Chk1</sup>        | This study     |
| D930  | GST-PKR-KD in Trp vector               | This study     |
| D935  | LIM-PKR-K296H                          | This study     |
| D934  | LIM-PKR-D414A                          | This study     |
| D911  | LIM-PKR-K296R                          | This study     |
| D936  | LIM-PKR <sup>phk1</sup> -KD            | This study     |
| D845  | GST-eIF2 $\alpha$ (1-180)              | [3]            |
| P722  | GCN2                                   | [4]            |
| pC901 | LIM-PKR-KD                             | [3]            |
| pC903 | Ldb-PKR-KD                             | [3]            |
| p1079 | pEMBlyx4::URA3                         | Vector plasmid |
| p2444 | pEMBlyx4::Trp                          | Vector plasmid |
| p180  | GCN4 <i>LacZ</i> reporter plasmid      | [4]            |

#### Reference:

1. Dar, A.C., T.E. Dever, and F. Sicheri, *Higher-order substrate recognition of eIF2 $\alpha$  by the RNA-dependent protein kinase PKR*. Cell, 2005. **122**(6): p. 887-900.
2. Dey, M., et al., *Mechanistic link between PKR dimerization, autophosphorylation, and eIF2 $\alpha$  substrate recognition*. Cell, 2005. **122**(6): p. 901-13.
3. Ung, T.L., et al., *Heterologous dimerization domains functionally substitute for the double-stranded RNA binding domains of the kinase PKR*. EMBO J, 2001. **20**(14): p. 3728-37.
4. Mueller, P.P. and A.G. Hinnebusch, *Multiple upstream AUG codons mediate translational control of GCN4*. Cell, 1986. **45**(2): p. 201-7.
